# Supplementary material for: Monitoring the Simultaneous Implantation of Ti and Tb Cations to a Sacrificial Template and the Sol-Gel Synthesis of Tb-Doped TiO2 (Anatase) Hollow Spheres and Their Transition to Rutile Phase
Source: MDPI journal article supplement (doi:10.3390/ijms232113162), 2022-10-29
Supplement: s1 [file s1]

Supplementary materials

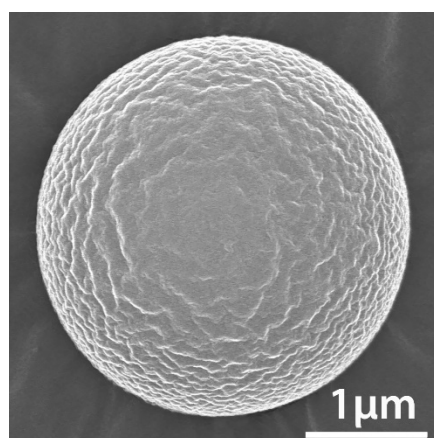

**Figure S1.** FEG-SEM image of the template.

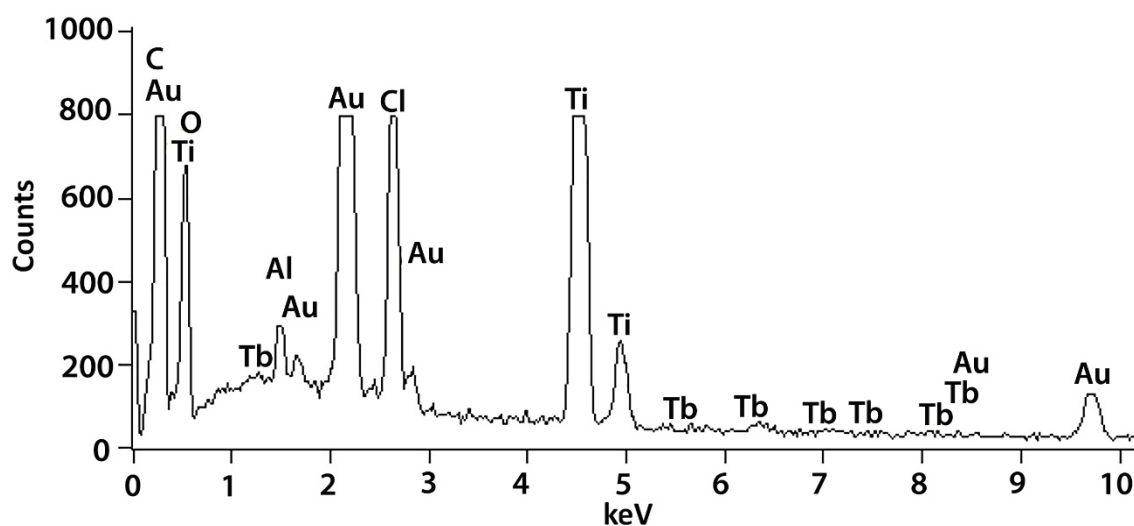

**Figure S2.** XEDS analysis of the template +  $\text{TiCl}_4$  and  $\text{TbCl}_3$  mixture +  $\text{HCl}$  (aq) after 5 h of reaction for the 0.12 at.% Tb (Fig. 4 (a) is the corresponding FEG-SEM picture of the sample).

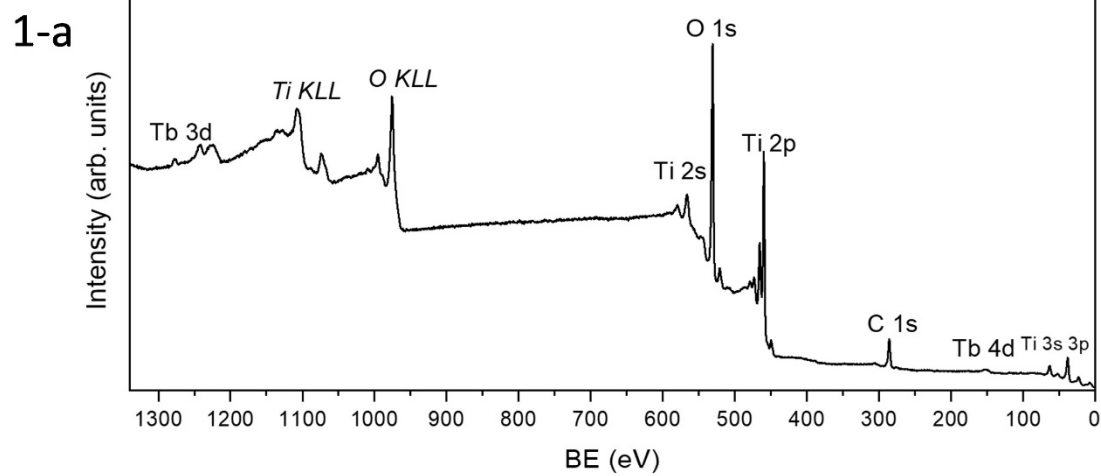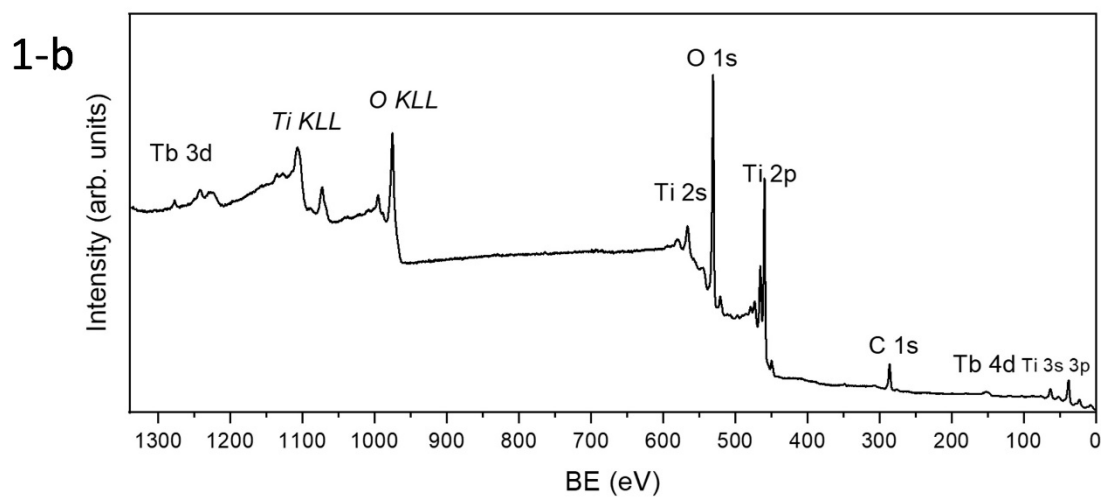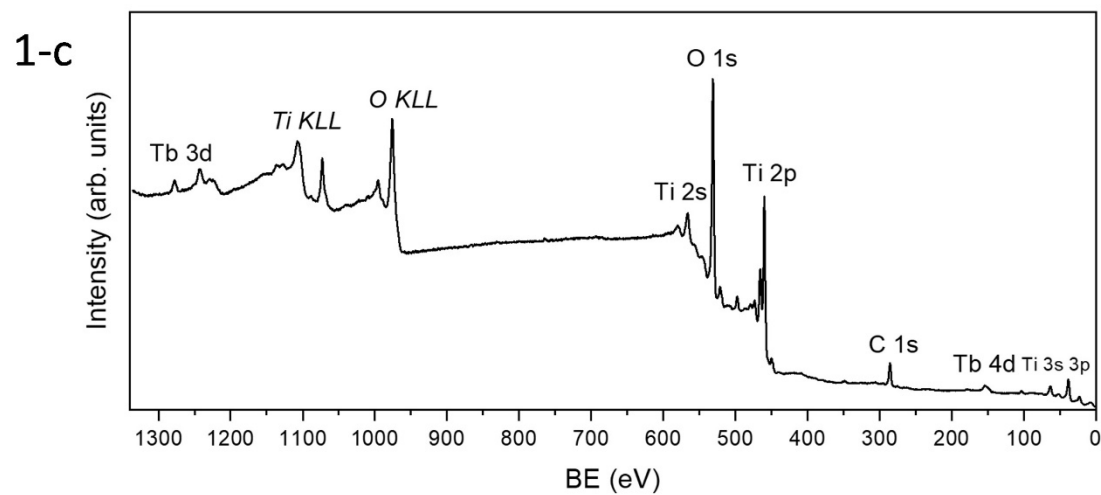

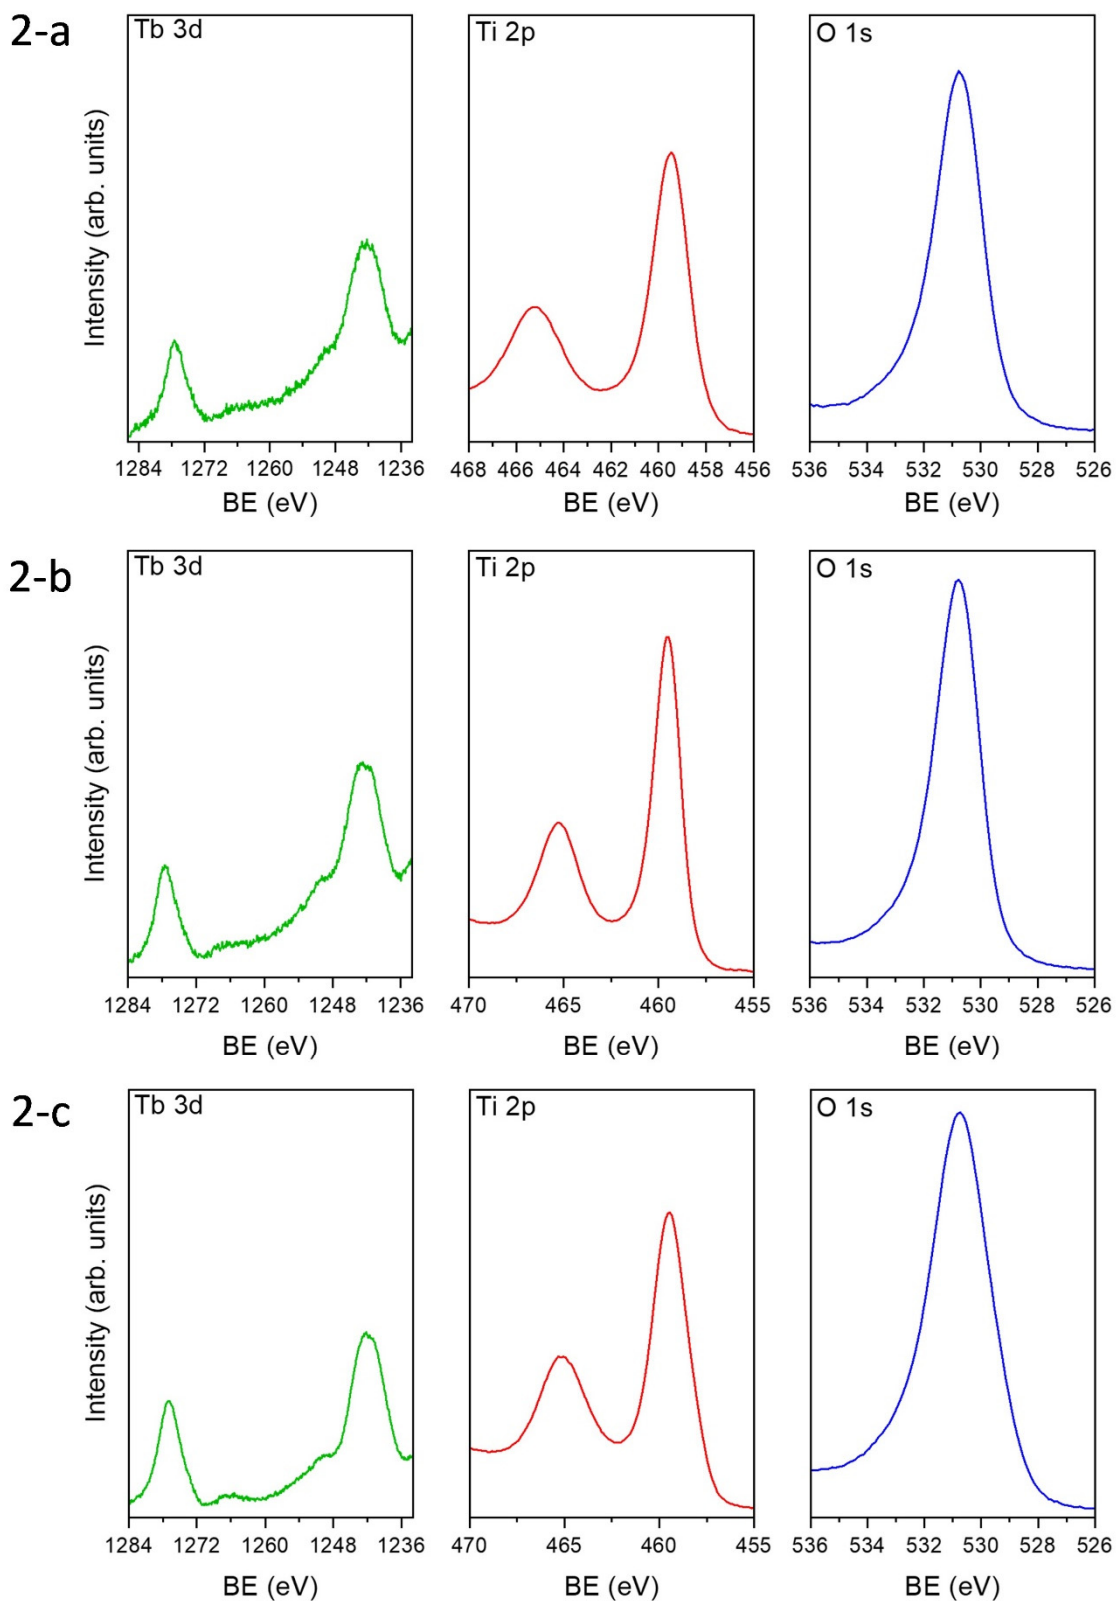

**Figure S3.** Survey photoemission spectra of 3.00%\_550 (1-a), 1.70%\_800 (1-b) and 1.70%\_1000 (1-c), respectively. Detailed X-ray photoelectron spectral regions of the main signals for the Tb 3d, Ti 2p and O 1s elements in 3.00%\_550 (2-a), 1.70%\_800 (2-b) and 1.70%\_1000 (2-c), respectively.

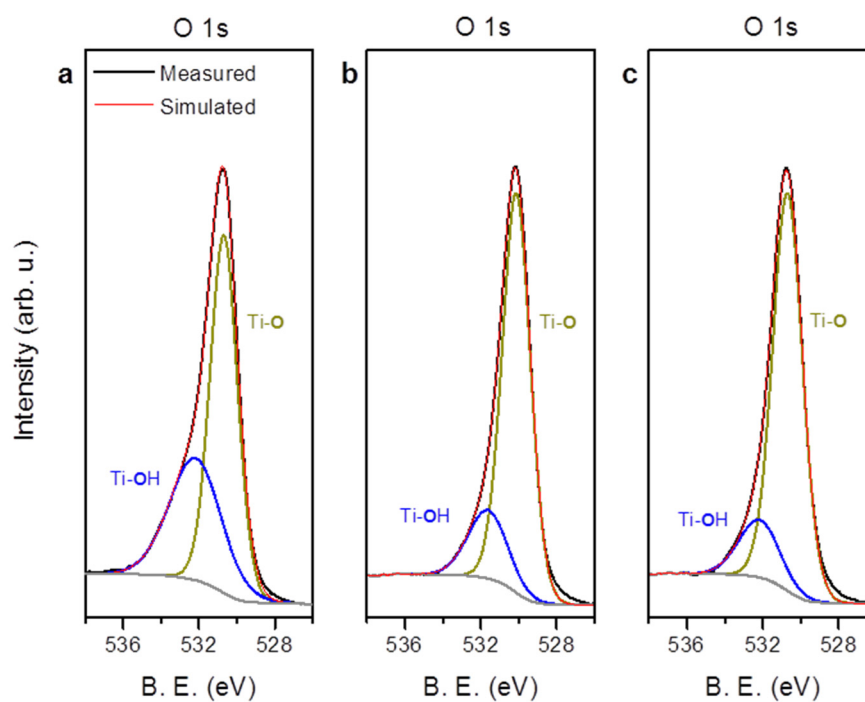

**Figure S4.** Experimental and fitted O 1s X-ray photoelectron spectral region of the samples calcined at 550 °C that shows two different bounded oxygen ((a): 0.00%\_550; (b): 1.70%\_550 and (c): 3.00%\_550).
